# Supplementary material for: The Role of Particle Size and Shape on the Recovery of Copper from Different Electrical and Electronic Equipment Waste
Source: MDPI journal article supplement (doi:10.3390/min13070847), 2023-06-22
Supplement: s1 [file s1]

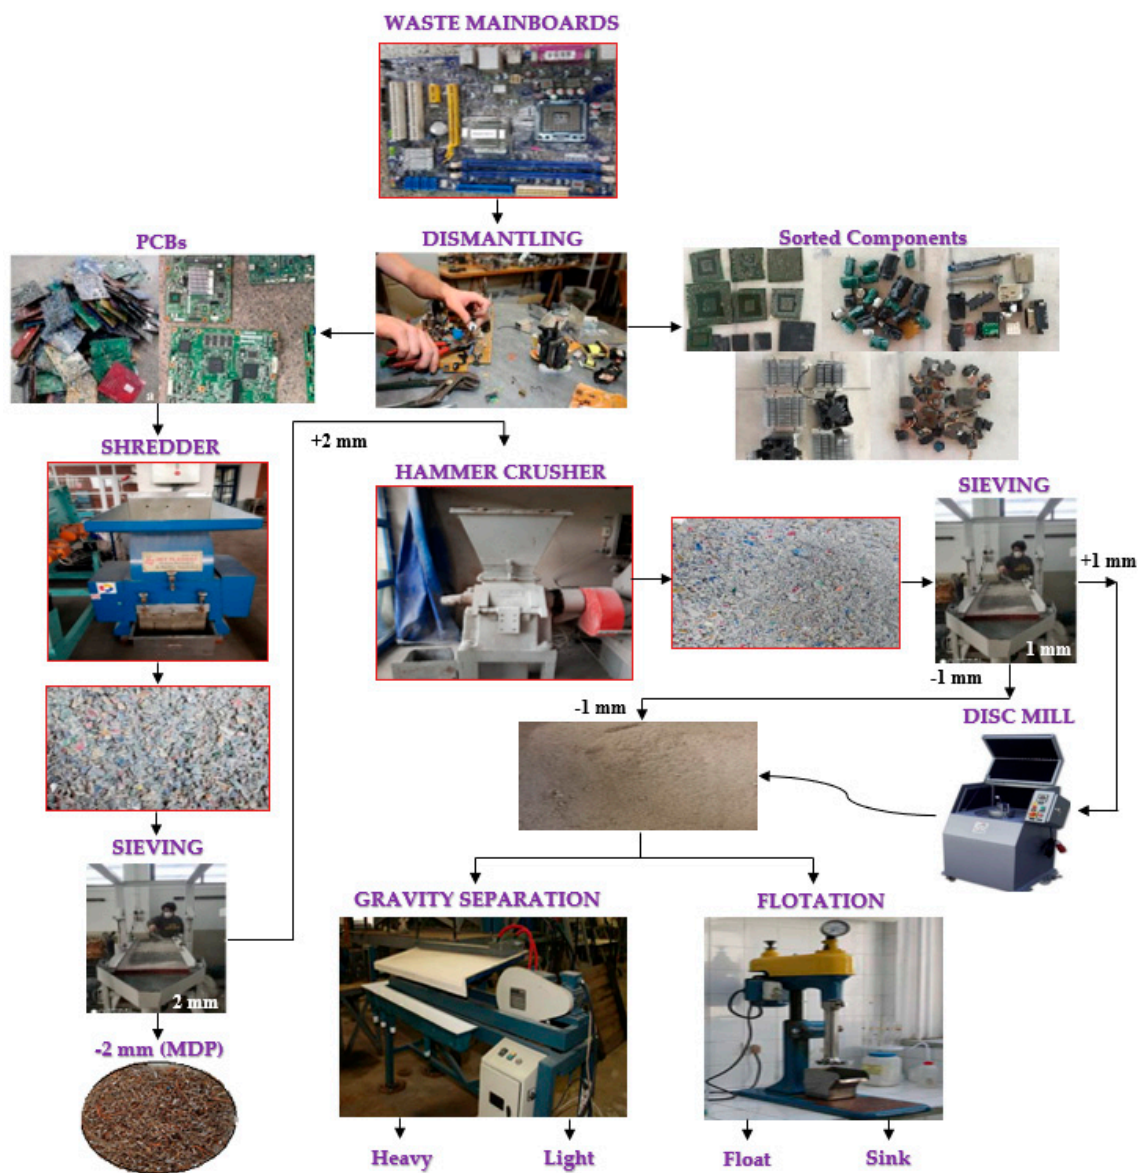

Figure S1. Schematic diagram of the preparation and the beneficiation studies on PCBs.

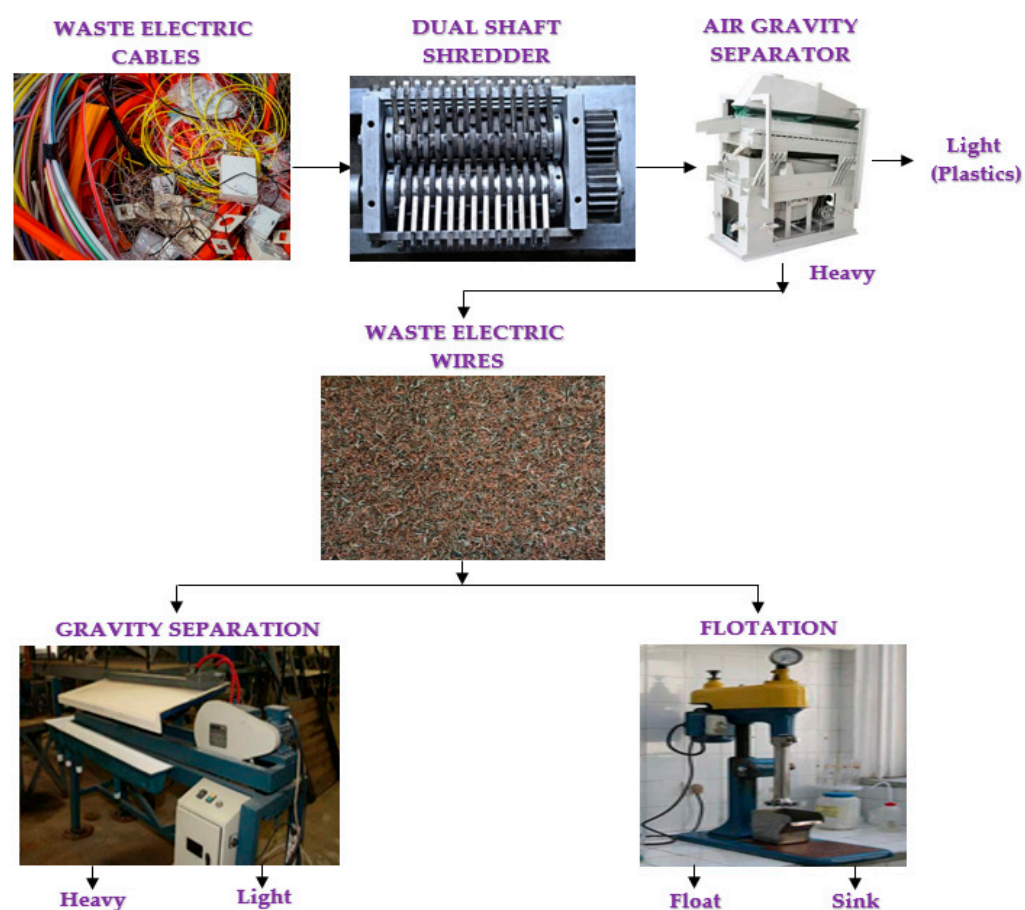

**Figure S2.** Schematic diagram of preparation and beneficiation studies on WEWs.

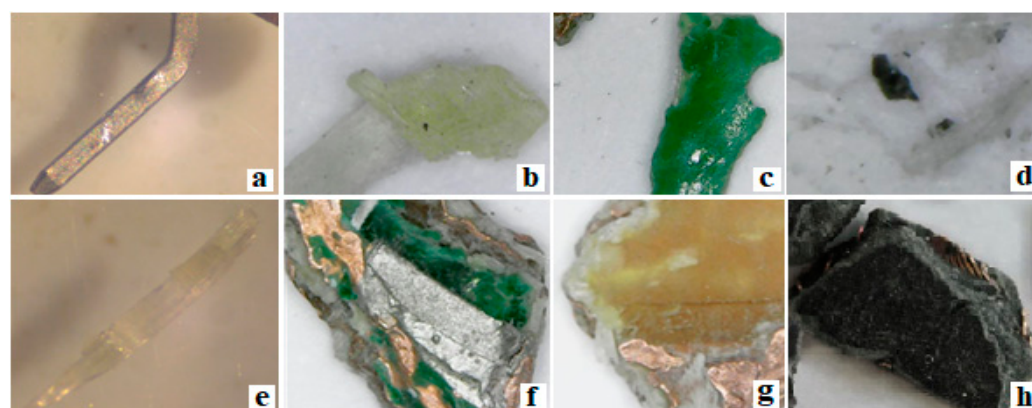

**Figure S3.** Optical micrographs of comminuted PCB particles after hammer crusher: (a) free metals, (b) free plastics, (c) free board pieces, (d) free ceramics, (e) free fibers, (f) locked board pieces, (g) locked plastics, (h) locked ceramics.

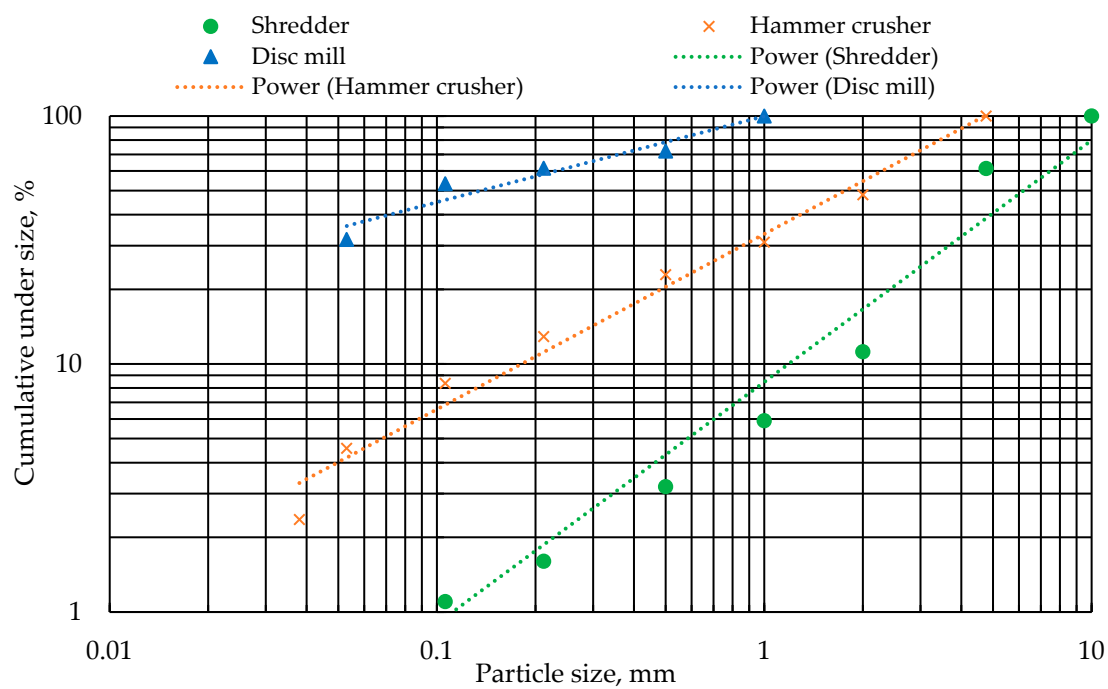

**Figure S4.** PSD curves of the comminuted products of PCBs.

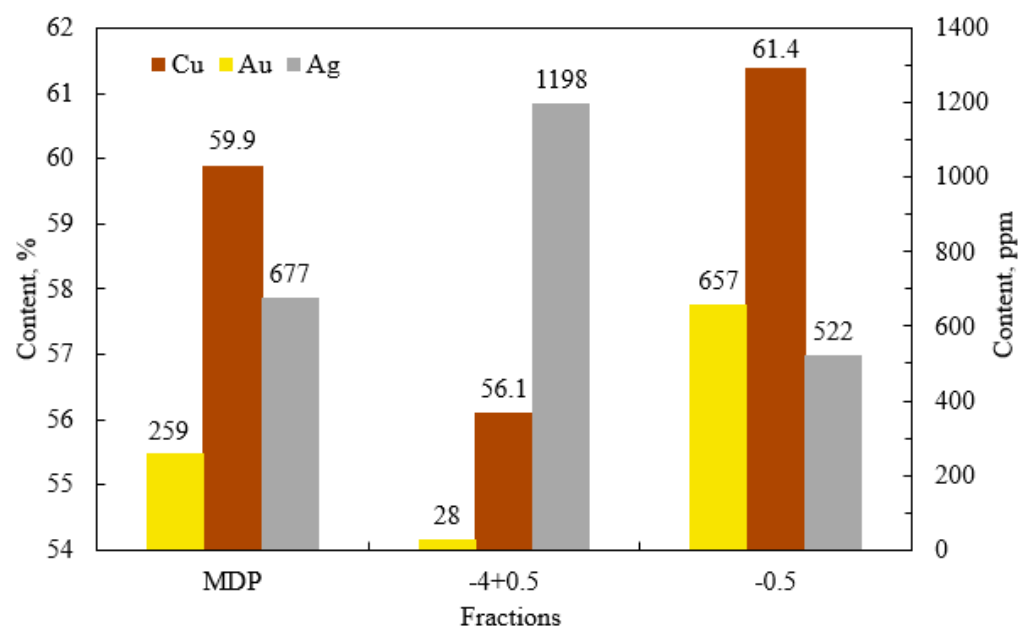

**Figure S5.** The contents of heavy fractions in shaking table separation at different fractions.

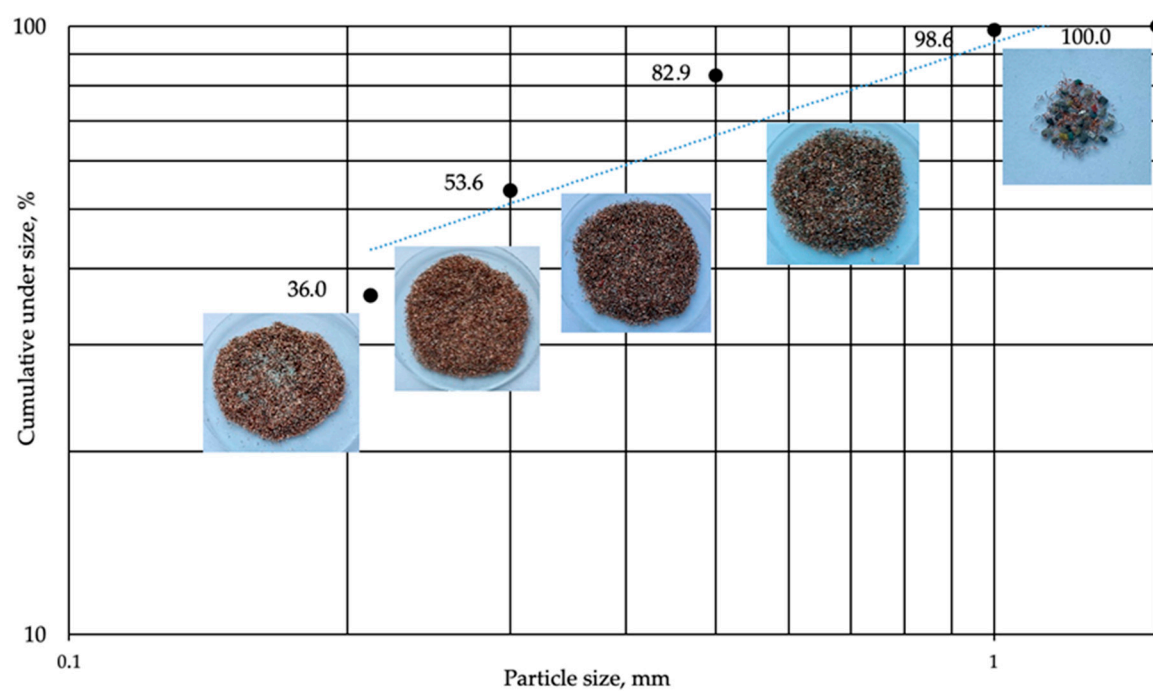

**Figure S6.** The PSD of the WEW sample and the images of products in different size groups.
