# Supplementary material for: The Role of Particle Size and Shape on the Recovery of Copper from Different Electrical and Electronic Equipment Waste
Source: MDPI journal article supplement (doi:10.3390/min13070847), 2023-06-22
Supplement: s1 [file s1]

Archive with 1 entries (1 files):
- minerals-2464921-supplementary.pdf
